# Supplementary material
Source: PubMed Central journal article supplement (PMC1783411)
Supplement: pnas_0609084103_1.pdf [file pnas_0609084103_1.pdf]

**Table 1. RNA expression value for var genes at different time points presented as relative copy number of each transcript.**

| Gene                         | RCN on     | RCN 10 weeks off |
|------------------------------|------------|------------------|
| BSD                          | 10.0661703 | 10.74092993      |
| PFL0935c                     | 0.2678793  | 0.775429755      |
| PF07_0139                    | 0.03610674 | 0.52330393       |
| PF07_0051                    | 0.03294209 | 0.390795971      |
| PFD0625c                     | 0.02779471 | 0.357884632      |
| PF11_0521                    | 0.02455441 | 0.337552077      |
| PF13_0001                    | 0.02397113 | 0.311059829      |
| PFD1015c                     | 0.02362931 | 0.306166428      |
| PF11_0007                    | 0.02352833 | 0.29124799       |
| PF07_0049                    | 0.02340765 | 0.278974759      |
| PFD1000c                     | 0.02084855 | 0.263442041      |
| PF08_0107                    | 0.01988511 | 0.261030718      |
| PF10_0001                    | 0.01971046 | 0.253078175      |
| PFL1955w/PFL1970w            | 0.01970926 | 0.1965952        |
| PFL0005w                     | 0.01845734 | 0.190109166      |
| PF08_0103                    | 0.01530653 | 0.174817558      |
| PF11_0008                    | 0.01475595 | 0.165357799      |
| PF07_0050                    | 0.01460164 | 0.142436026      |
| MAL7P1.56                    | 0.01458821 | 0.134509829      |
| PFE0005w                     | 0.01443972 | 0.12937807       |
| PFI0005w                     | 0.01439979 | 0.107074252      |
| PFL2665c                     | 0.01364478 | 0.103708928      |
| MAL7P1.55                    | 0.01193085 | 0.100232272      |
| PF13_0364                    | 0.01162803 | 0.0874783        |
| PF07_0048                    | 0.01137967 | 0.079540889      |
| PFD0615c                     | 0.0098518  | 0.07828724       |
| PF10_0406                    | 0.0095509  | 0.066093468      |
| PFD0005w                     | 0.00883936 | 0.063945671      |
| PFL0030c                     | 0.00864908 | 0.054771891      |
| PF08_0142                    | 0.00815749 | 0.053036118      |
| PFA0005w                     | 0.00720222 | 0.051424761      |
| PFL1950w                     | 0.00709883 | 0.051353556      |
| PFD1005c                     | 0.00698507 | 0.050835812      |
| PFD0995c                     | 0.00649539 | 0.050728893      |
| MAL6P1.4                     | 0.0061582  | 0.048509059      |
| PFD1245c                     | 0.00580939 | 0.045858739      |
| PF08_0106                    | 0.00534012 | 0.043416749      |
| PFI1830c                     | 0.00524928 | 0.042261404      |
| PFE1640w                     | 0.00510666 | 0.041797516      |
| PFB1055c                     | 0.00498575 | 0.031499626      |
| PFA0015c/pFI1820w/Mal6P1.314 | 0.00496669 | 0.030581903      |
| PFL1960w                     | 0.00486616 | 0.02766723       |
| MAL6P1.1                     | 0.0045603  | 0.0268315        |
| PFL0020w                     | 0.0040096  | 0.026122133      |
| PFI1820w                     | 0.00353629 | 0.024588619      |

|                   |            |             |
|-------------------|------------|-------------|
| PF13_0003         | 0.00340269 | 0.023935006 |
| PFD0020c          | 0.00318066 | 0.022692062 |
| PFC1120c/PFC0005w | 0.00308688 | 0.019813678 |
| PFD0630c/PFD0635c | 0.00308444 | 0.018083522 |
| PFA0765c          | 0.00301634 | 0.017941384 |
| MAL6P1.316        | 0.00301477 | 0.014788023 |
| MAL6P1.252        | 0.0027981  | 0.013903761 |
| PFD1235w/Mal7P1.1 | 0.00228334 | 0.011806049 |
| PFB0010w          | 0.00121341 | 0.011554062 |
| PFA0015c          | 0.00084909 | 0.009215774 |
| PF08_0141         | 0.00071674 | 0.002743056 |
| PF08_0140         | 0.00056872 | 0.00229591  |
| MAL7P1.50         | 0.00056872 | 0.002152158 |
| SUM               | 10.9404723 | 17.78267086 |
